# Supplementary material for: Processing and characterization of silver-filled conductive polysulfide sealants for aerospace applications
Source: Royal Society of Chemistry journal article supplement (doi:10.1039/c8sm02004c), 2018-01-01
Supplement: c8sm02004c1.pdf [file c8sm02004c1.pdf]

## Support Information

### Processing and Characterization of Silver-Filled Conductive Polysulfide

#### Sealants for Aerospace applications

*Bo Song<sup>a</sup>, Jiaxiong Li<sup>a</sup>, Fan Wu<sup>a</sup>, Shiv Patel<sup>a</sup>, Jinho Hah<sup>a</sup>, Xueqiao Wang<sup>a</sup>, Kyoung-sik Moon*

*<sup>a</sup> and Ching-Ping Wong<sup>a</sup>*

<sup>a</sup>School of Materials Science and Engineering, Georgia Institute of Technology, 771 Ferst Drive,  
Atlanta, GA 30332, United States,

\*E-mail: [cpwong@mse.gatech.edu](mailto:cpwong@mse.gatech.edu)

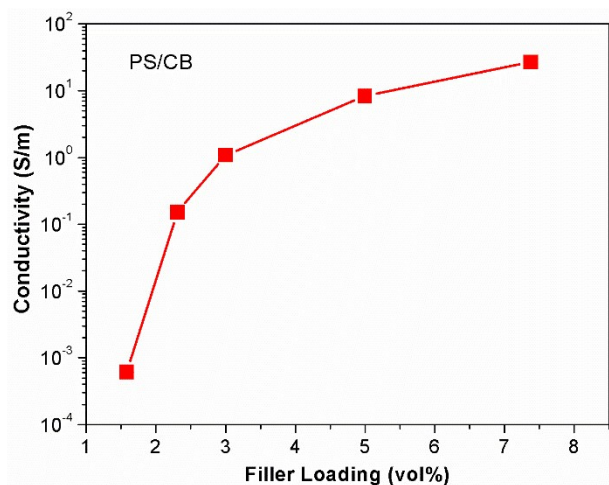

Figure S1. Conductivity of room temperature cured PS/CB sealants with different filler loadings.

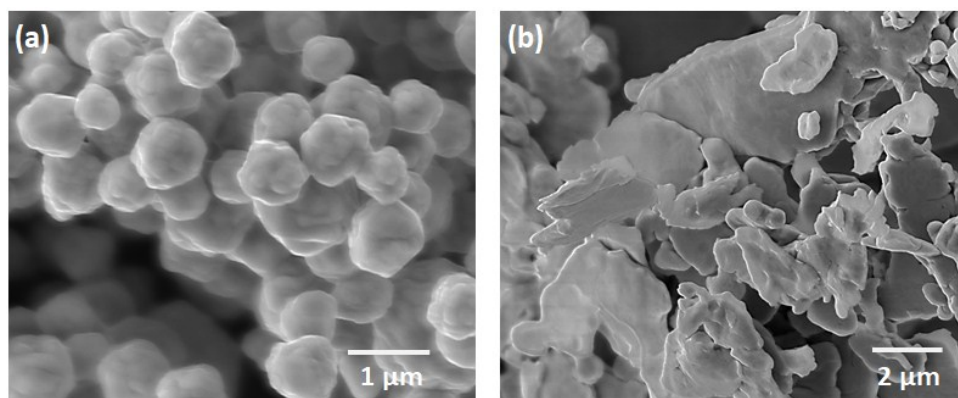

Figure S2. Conductivity of room temperature cured PS/CB sealants with different filler loadings.

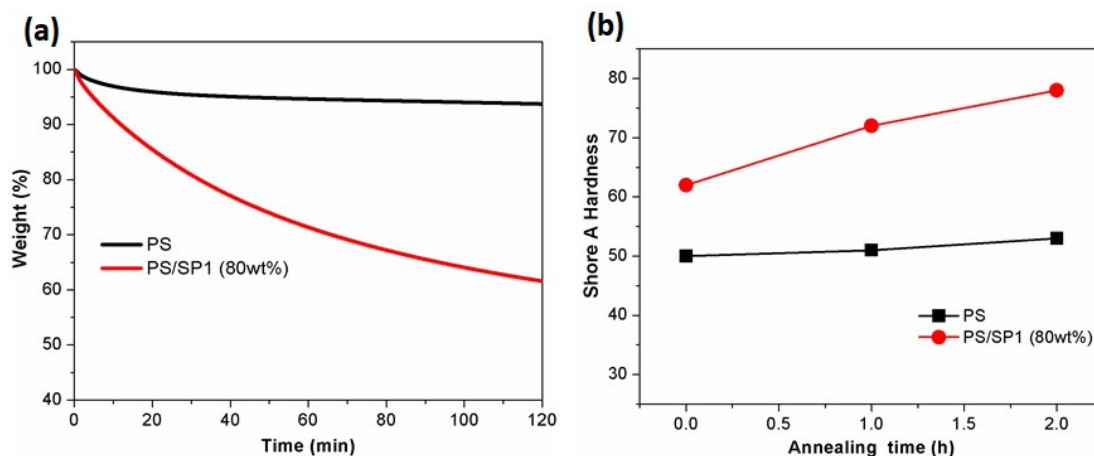

Figure S3. (a)TGA curves and (b) hardness change of PS and PS/SP1 (80wt%) sealants under isothermal annealing at 150°C with regards to time.

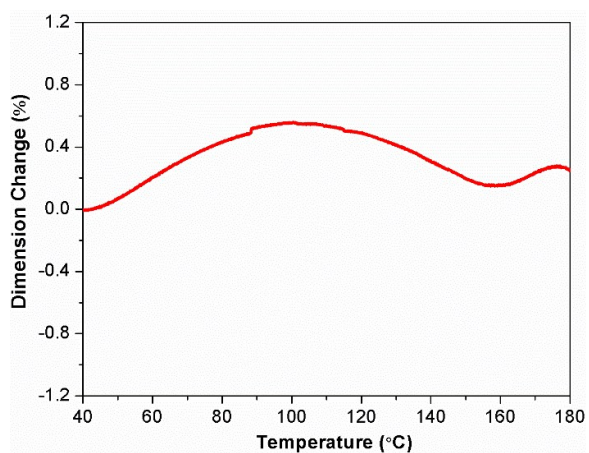

Figure S4. Dimension change of PS resin versus temperature.
